# Supplementary material
Source: publisher figshare collection journal article supplement (https://acs.figshare.com/ndownloader/files/4401556)
Supplement: Supplementary file 1 [file 4401556]

 
#  CIF produced by WinGX routine CIF_UPDATE
#  Created on 2002-06-24 at 10:00:47
#  Using CIFtbx version 2.6.2 16 Jun 1998
 
#  Dictionary name : cif_core.dic
#  Dictionary vers : 2.1
#  Request file    : c:\wingx\files\archive.dat
#  CIF files read  : 1902ph1 dreduc struct psi_scan
 
 
data_1902ph1
 
_audit_creation_date            2002-06-24T10:00:47-00:00
_audit_creation_method         'WinGX routine CIF_UPDATE'
_audit_conform_dict_name        cif_core.dic
_audit_conform_dict_version     2.1
_audit_conform_dict_location    ftp://ftp.iucr.org/cifdics/cif_core.dic
_publ_requested_category        FO
 
#----------------------------------------------------------------------------#
#                   CHEMICAL INFORMATION                                     #
#----------------------------------------------------------------------------#
 
_chemical_name_systematic
;
 ?
;
_chemical_formula_moiety                'C16 H19 N1 O6'
_chemical_formula_structural            'C16 H19 O6 N'
_chemical_formula_sum                   'C16 H19 N O6'
_chemical_formula_weight                321.32
_chemical_compound_source               'synthesis as described'
 
#----------------------------------------------------------------------------#
#                   UNIT CELL INFORMATION                                    #
#----------------------------------------------------------------------------#
 
_symmetry_cell_setting                  monoclinic
_symmetry_space_group_name_H-M          'C 2'
_symmetry_space_group_name_Hall         'C 2y'
_symmetry_Int_Tables_number             5
loop_
    _symmetry_equiv_pos_as_xyz
'x, y, z'
'-x, y, -z'
'x+1/2, y+1/2, z'
'-x+1/2, y+1/2, -z'
 
_cell_length_a                          14.9300(10)
_cell_length_b                          6.9429(5)
_cell_length_c                          15.8040(10)
_cell_angle_alpha                       90
_cell_angle_beta                        90.334(7)
_cell_angle_gamma                       90
_cell_volume                            1638.18(19)
_cell_formula_units_Z                   4
_cell_measurement_temperature           293(2)
_cell_measurement_reflns_used           25
_cell_measurement_theta_min             9.822
_cell_measurement_theta_max             14.557
_cell_measurement_wavelength            0.71073
 
#----------------------------------------------------------------------------#
#                   CRYSTAL INFORMATION                                      #
#----------------------------------------------------------------------------#
 
_exptl_crystal_description              prism
_exptl_crystal_colour                   colourless
_exptl_crystal_size_max                 0.5
_exptl_crystal_size_mid                 0.4
_exptl_crystal_size_min                 0.3
_exptl_crystal_density_diffrn           1.303
_exptl_crystal_density_method           'not measured'
_exptl_crystal_F_000                    680
_exptl_special_details
;
 ?
;
 
#----------------------------------------------------------------------------#
#                   ABSORPTION CORRECTION                                    #
#----------------------------------------------------------------------------#
 
_exptl_absorpt_coefficient_mu           0.1
_exptl_absorpt_factor_muR               0.03
_exptl_absorpt_correction_type          psi-scan
_exptl_absorpt_process_details
;
North A.C.T., Phillips D.C. & Mathews F.S. (1968) Acta. Cryst. A24, 351
        Number of psi-scan sets used was   3
        Theta correction was applied.
        Averaged transmission function was used.
        No Fourier smoothing was applied.
;
_exptl_absorpt_correction_T_min         0.8999
_exptl_absorpt_correction_T_max         0.9683
_exptl_absorpt_correction_T_ave         0.9235
 
#----------------------------------------------------------------------------#
#                   DATA COLLECTION                                          #
#----------------------------------------------------------------------------#
 
_diffrn_source                          'Enraf Nonius FR590'
_diffrn_ambient_temperature             293(2)
_diffrn_radiation_wavelength            0.71073
_diffrn_radiation_type                  MoK\a
_diffrn_radiation_monochromator         graphite
_diffrn_radiation_probe                 x-ray
_diffrn_detector                        'scintillation LiI'
_diffrn_detector_dtime                  1.195
_diffrn_orient_matrix_type
;
  x-axis points to radiation source
  the matrix is specified in reciprocal space
;
_diffrn_orient_matrix_ub_11             -0.64779E-1
_diffrn_orient_matrix_ub_12             0.6669E-2
_diffrn_orient_matrix_ub_13             0.15425E-1
_diffrn_orient_matrix_ub_21             0.01396
_diffrn_orient_matrix_ub_22             -0.60083E-1
_diffrn_orient_matrix_ub_23             0.56039E-1
_diffrn_orient_matrix_ub_31             0.9701E-2
_diffrn_orient_matrix_ub_32             0.130761
_diffrn_orient_matrix_ub_33             0.24995E-1
_diffrn_measurement_device              '\k-geometry diffractometer'
_diffrn_measurement_device_type         'Enraf Nonius TurboCAD4'
_diffrn_measurement_method              'non-profiled omega scans'
_diffrn_standards_number                3
_diffrn_standards_interval_time         120
_diffrn_standards_decay_%               2
_diffrn_standards_decay_corr_max        1.085
_diffrn_standards_decay_corr_min        0.998
loop_
    _diffrn_standard_refln_index_h
    _diffrn_standard_refln_index_k
    _diffrn_standard_refln_index_l
7 -1 5
-3 -1 8
3 3 1
 
_diffrn_reflns_number                   1636
_diffrn_reflns_av_R_equivalents         0.0371
_diffrn_reflns_av_unetI/netI            0.0308
_diffrn_reflns_limit_h_min              0
_diffrn_reflns_limit_h_max              17
_diffrn_reflns_limit_k_min              0
_diffrn_reflns_limit_k_max              8
_diffrn_reflns_limit_l_min              -18
_diffrn_reflns_limit_l_max              18
_diffrn_reflns_theta_min                2.58
_diffrn_reflns_theta_max                24.98
_diffrn_reflns_theta_full               24.98
_diffrn_measured_fraction_theta_full
                                        0.999
_diffrn_measured_fraction_theta_max
                                        0.999
_reflns_number_total                    1569
_reflns_number_gt                       1096
_reflns_threshold_expression            >2sigma(I)
 
#----------------------------------------------------------------------------#
#                   COMPUTER PROGRAMS USED                                   #
#----------------------------------------------------------------------------#
 
_computing_data_collection              'CAD4 Express (Enraf Nonius, 1994)'
_computing_cell_refinement              'CAD4 Express (Enraf Nonius, 1994)'
_computing_data_reduction               'XCAD4 (Harms & Wocadlo, 1995)'
_computing_structure_refinement         'SHELXL-97 (Sheldrick, 1997)'
_computing_molecular_graphics           'Ortep-3 for Windows (Farrugia, 1997)'
_computing_publication_material
                                   'WinGX publication routines (Farrugia, 1999)'
 
#----------------------------------------------------------------------------#
#                   REFINEMENT INFORMATION                                   #
#----------------------------------------------------------------------------#
 
_refine_special_details
;
 Refinement of F^2^ against ALL reflections.  The weighted R-factor wR and
 goodness of fit S are based on F^2^, conventional R-factors R are based
 on F, with F set to zero for negative F^2^. The threshold expression of
 F^2^ > 2sigma(F^2^) is used only for calculating R-factors(gt) etc. and is
 not relevant to the choice of reflections for refinement.  R-factors based
 on F^2^ are statistically about twice as large as those based on F, and R-
 factors based on ALL data will be even larger.
;
_refine_ls_structure_factor_coef        Fsqd
_refine_ls_matrix_type                  full
_refine_ls_weighting_scheme             calc
_refine_ls_weighting_details
         'calc w=1/[\s^2^(Fo^2^)+(0.0675P)^2^+0.2137P] where P=(Fo^2^+2Fc^2^)/3'
_atom_sites_solution_primary            direct
_atom_sites_solution_secondary          difmap
_atom_sites_solution_hydrogens          geom
_refine_ls_hydrogen_treatment           constr
_refine_ls_extinction_method            SHELXL
_refine_ls_extinction_expression
                                    Fc^*^=kFc[1+0.001xFc^2^\l^3^/sin(2\q)]^-1/4^
_refine_ls_extinction_coef              0.0081(16)
_refine_ls_number_reflns                1569
_refine_ls_number_parameters            209
_refine_ls_number_restraints            1
_refine_ls_R_factor_all                 0.0738
_refine_ls_R_factor_gt                  0.0413
_refine_ls_wR_factor_ref                0.1193
_refine_ls_wR_factor_gt                 0.1035
_refine_ls_goodness_of_fit_ref          1.049
_refine_ls_restrained_S_all             1.049
_refine_ls_shift/su_max                 0
_refine_ls_shift/su_mean                0
_refine_ls_abs_structure_details
                                    'Flack H D (1983), Acta Cryst. A39, 876-881'
_refine_ls_abs_structure_Flack          0(2)
_refine_diff_density_max                0.142
_refine_diff_density_min                -0.13
_refine_diff_density_rms                0.034
 
#----------------------------------------------------------------------------#
#                   ATOMIC TYPES, COORDINATES AND THERMAL PARAMETERS         #
#----------------------------------------------------------------------------#
 
loop_
    _atom_type_symbol
    _atom_type_description
    _atom_type_scat_dispersion_real
    _atom_type_scat_dispersion_imag
    _atom_type_scat_source
C C 0.0033 0.0016 'International Tables Vol C Tables 4.2.6.8 and 6.1.1.4'
H H 0 0 'International Tables Vol C Tables 4.2.6.8 and 6.1.1.4'
N N 0.0061 0.0033 'International Tables Vol C Tables 4.2.6.8 and 6.1.1.4'
O O 0.0106 0.006 'International Tables Vol C Tables 4.2.6.8 and 6.1.1.4'
 
loop_
    _atom_site_label
    _atom_site_type_symbol
    _atom_site_fract_x
    _atom_site_fract_y
    _atom_site_fract_z
    _atom_site_U_iso_or_equiv
    _atom_site_adp_type
    _atom_site_occupancy
    _atom_site_symmetry_multiplicity
    _atom_site_calc_flag
    _atom_site_refinement_flags
    _atom_site_disorder_assembly
    _atom_site_disorder_group
C1 C 0.4699(3) 0.1351(8) 0.1129(3) 0.0623(12) Uani 1 1 d . . .
C2 C 0.5415(2) 0.2178(6) 0.1660(3) 0.0559(11) Uani 1 1 d . . .
H2A H 0.5984 0.1557 0.1546 0.067 Uiso 1 1 calc R . .
H2B H 0.5278 0.203 0.2256 0.067 Uiso 1 1 calc R . .
C3 C 0.5446(2) 0.4300(6) 0.1417(2) 0.0484(10) Uani 1 1 d . . .
H3 H 0.5851 0.4409 0.0933 0.058 Uiso 1 1 calc R . .
C4 C 0.4494(2) 0.4621(6) 0.1078(2) 0.0471(9) Uani 1 1 d . . .
H4 H 0.4529 0.5515 0.0599 0.057 Uiso 1 1 calc R . .
C5 C 0.5780(3) 0.5683(7) 0.2081(3) 0.0652(12) Uani 1 1 d . . .
H5A H 0.5435 0.5504 0.2593 0.078 Uiso 1 1 calc R . .
H5B H 0.5681 0.699 0.1885 0.078 Uiso 1 1 calc R . .
C6 C 0.6767(3) 0.5427(9) 0.2288(3) 0.0760(14) Uani 1 1 d . . .
H6A H 0.6941 0.6338 0.2716 0.114 Uiso 1 1 calc R . .
H6B H 0.7115 0.5639 0.1788 0.114 Uiso 1 1 calc R . .
H6C H 0.6869 0.4143 0.2493 0.114 Uiso 1 1 calc R . .
C7 C 0.3788(2) 0.5368(6) 0.1680(2) 0.0467(9) Uani 1 1 d . . .
H7 H 0.395 0.6672 0.1862 0.056 Uiso 1 1 calc R . .
C8 C 0.2856(2) 0.5391(7) 0.1319(2) 0.0576(11) Uani 1 1 d . . .
H8A H 0.2446 0.5821 0.1754 0.069 Uiso 1 1 calc R . .
H8B H 0.269 0.4086 0.1165 0.069 Uiso 1 1 calc R . .
C9 C 0.2745(3) 0.6669(8) 0.0551(3) 0.0740(14) Uani 1 1 d . . .
H9A H 0.2138 0.6599 0.0351 0.111 Uiso 1 1 calc R . .
H9B H 0.3142 0.6245 0.0113 0.111 Uiso 1 1 calc R . .
H9C H 0.2885 0.7975 0.0701 0.111 Uiso 1 1 calc R . .
C10 C 0.3627(3) 0.4862(7) 0.3160(3) 0.0579(11) Uani 1 1 d . . .
C11 C 0.3666(3) 0.3438(6) 0.3861(2) 0.0531(10) Uani 1 1 d . . .
C12 C 0.3775(3) 0.1498(7) 0.3729(2) 0.0593(12) Uani 1 1 d . . .
H12 H 0.3819 0.1028 0.318 0.071 Uiso 1 1 calc R . .
C13 C 0.3821(3) 0.0247(7) 0.4400(2) 0.0697(13) Uani 1 1 d . . .
H13 H 0.3894 -0.1067 0.431 0.084 Uiso 1 1 calc R . .
C14 C 0.3757(3) 0.0959(7) 0.5197(3) 0.0648(12) Uani 1 1 d . . .
C15 C 0.3646(4) 0.2890(9) 0.5356(3) 0.0821(16) Uani 1 1 d . . .
H15 H 0.3607 0.3347 0.5908 0.099 Uiso 1 1 calc R . .
C16 C 0.3596(3) 0.4119(8) 0.4685(3) 0.0787(15) Uani 1 1 d . . .
H16 H 0.3513 0.5429 0.4779 0.094 Uiso 1 1 calc R . .
N1 N 0.3799(3) -0.0351(7) 0.5929(2) 0.0868(14) Uani 1 1 d . . .
O1 O 0.42143(17) 0.2765(4) 0.07544(16) 0.0556(8) Uani 1 1 d . . .
O2 O 0.4513(3) -0.0307(6) 0.1009(3) 0.1038(14) Uani 1 1 d . . .
O3 O 0.38032(15) 0.4081(4) 0.24141(14) 0.0474(7) Uani 1 1 d . . .
O4 O 0.3458(3) 0.6537(5) 0.3267(2) 0.0911(12) Uani 1 1 d . . .
O5 O 0.3926(5) -0.2046(7) 0.5785(2) 0.153(2) Uani 1 1 d . . .
O6 O 0.3736(4) 0.0268(7) 0.66259(19) 0.1210(15) Uani 1 1 d . . .
 
loop_
    _atom_site_aniso_label
    _atom_site_aniso_U_11
    _atom_site_aniso_U_22
    _atom_site_aniso_U_33
    _atom_site_aniso_U_23
    _atom_site_aniso_U_13
    _atom_site_aniso_U_12
C1 0.061(3) 0.058(3) 0.068(3) -0.002(2) 0.011(2) 0.003(2)
C2 0.047(2) 0.060(3) 0.061(2) 0.007(2) 0.0029(17) 0.007(2)
C3 0.0451(19) 0.054(3) 0.0462(19) -0.001(2) 0.0027(15) 0.0007(19)
C4 0.052(2) 0.046(2) 0.0429(19) 0.0046(18) 0.0008(16) -0.0028(18)
C5 0.061(2) 0.066(3) 0.068(3) -0.009(3) -0.009(2) -0.002(2)
C6 0.059(2) 0.089(4) 0.080(3) -0.011(3) -0.011(2) -0.010(3)
C7 0.054(2) 0.043(2) 0.0433(19) 0.0021(19) -0.0004(15) 0.0084(19)
C8 0.050(2) 0.066(3) 0.057(2) 0.000(2) 0.0000(17) 0.014(2)
C9 0.069(3) 0.084(4) 0.068(3) 0.004(3) -0.011(2) 0.022(3)
C10 0.072(3) 0.055(3) 0.046(2) -0.005(2) 0.0051(19) 0.011(2)
C11 0.061(2) 0.056(3) 0.042(2) -0.0070(19) 0.0051(17) 0.001(2)
C12 0.081(3) 0.056(3) 0.040(2) -0.009(2) 0.0028(19) -0.011(2)
C13 0.110(3) 0.054(3) 0.045(2) 0.000(2) 0.002(2) -0.016(3)
C14 0.090(3) 0.062(3) 0.042(2) 0.001(2) -0.003(2) -0.019(2)
C15 0.129(4) 0.076(4) 0.041(2) -0.011(3) 0.011(2) -0.006(3)
C16 0.131(4) 0.058(3) 0.048(2) -0.007(2) 0.011(3) 0.005(3)
N1 0.135(4) 0.076(4) 0.049(2) 0.001(2) -0.001(2) -0.029(3)
O1 0.0569(15) 0.0551(19) 0.0547(15) -0.0112(15) -0.0028(12) 0.0020(14)
O2 0.108(3) 0.052(2) 0.151(4) -0.012(2) -0.016(2) -0.006(2)
O3 0.0561(14) 0.0463(15) 0.0399(13) -0.0015(13) 0.0051(10) 0.0048(13)
O4 0.159(3) 0.056(2) 0.0590(19) -0.0101(17) 0.0086(19) 0.029(2)
O5 0.329(8) 0.067(3) 0.064(2) 0.009(3) -0.003(3) -0.017(4)
O6 0.221(4) 0.102(3) 0.0405(18) 0.002(2) -0.001(2) -0.025(3)
 
 
#----------------------------------------------------------------------------#
#                   MOLECULAR GEOMETRY                                       #
#----------------------------------------------------------------------------#
 
_geom_special_details
;
 All esds (except the esd in the dihedral angle between two l.s. planes)
 are estimated using the full covariance matrix.  The cell esds are taken
 into account individually in the estimation of esds in distances, angles
 and torsion angles; correlations between esds in cell parameters are only
 used when they are defined by crystal symmetry.  An approximate (isotropic)
 treatment of cell esds is used for estimating esds involving l.s. planes.
;
loop_
    _geom_bond_atom_site_label_1
    _geom_bond_atom_site_label_2
    _geom_bond_distance
    _geom_bond_site_symmetry_2
    _geom_bond_publ_flag
C1 O2 1.198(6) . ?
C1 O1 1.354(5) . ?
C1 C2 1.473(6) . ?
C2 C3 1.524(6) . ?
C3 C5 1.505(6) . ?
C3 C4 1.533(5) . ?
C4 O1 1.447(5) . ?
C4 C7 1.515(5) . ?
C5 C6 1.517(5) . ?
C7 O3 1.465(4) . ?
C7 C8 1.501(5) . ?
C8 C9 1.511(6) . ?
C10 O4 1.201(5) . ?
C10 O3 1.326(5) . ?
C10 C11 1.485(6) . ?
C11 C12 1.372(6) . ?
C11 C16 1.390(5) . ?
C12 C13 1.372(6) . ?
C13 C14 1.358(6) . ?
C14 C15 1.374(7) . ?
C14 N1 1.473(6) . ?
C15 C16 1.363(7) . ?
N1 O6 1.186(5) . ?
N1 O5 1.214(6) . ?
 
loop_
    _geom_angle_atom_site_label_1
    _geom_angle_atom_site_label_2
    _geom_angle_atom_site_label_3
    _geom_angle
    _geom_angle_site_symmetry_1
    _geom_angle_site_symmetry_3
    _geom_angle_publ_flag
O2 C1 O1 120.3(5) . . ?
O2 C1 C2 129.1(5) . . ?
O1 C1 C2 110.5(4) . . ?
C1 C2 C3 104.9(4) . . ?
C5 C3 C2 116.8(3) . . ?
C5 C3 C4 117.0(3) . . ?
C2 C3 C4 101.5(3) . . ?
O1 C4 C7 109.0(3) . . ?
O1 C4 C3 105.0(3) . . ?
C7 C4 C3 118.5(3) . . ?
C3 C5 C6 113.2(4) . . ?
O3 C7 C8 108.5(3) . . ?
O3 C7 C4 106.3(3) . . ?
C8 C7 C4 114.3(3) . . ?
C7 C8 C9 114.1(3) . . ?
O4 C10 O3 124.3(4) . . ?
O4 C10 C11 123.2(4) . . ?
O3 C10 C11 112.5(4) . . ?
C12 C11 C16 119.0(4) . . ?
C12 C11 C10 123.0(4) . . ?
C16 C11 C10 118.0(4) . . ?
C13 C12 C11 120.7(4) . . ?
C14 C13 C12 118.9(5) . . ?
C13 C14 C15 122.3(5) . . ?
C13 C14 N1 120.1(5) . . ?
C15 C14 N1 117.7(4) . . ?
C16 C15 C14 118.3(4) . . ?
C15 C16 C11 120.8(5) . . ?
O6 N1 O5 122.6(5) . . ?
O6 N1 C14 120.1(5) . . ?
O5 N1 C14 117.2(4) . . ?
C1 O1 C4 109.8(3) . . ?
C10 O3 C7 116.9(3) . . ?
 
loop_
    _geom_torsion_atom_site_label_1
    _geom_torsion_atom_site_label_2
    _geom_torsion_atom_site_label_3
    _geom_torsion_atom_site_label_4
    _geom_torsion
    _geom_torsion_site_symmetry_1
    _geom_torsion_site_symmetry_2
    _geom_torsion_site_symmetry_3
    _geom_torsion_site_symmetry_4
    _geom_torsion_publ_flag
O2 C1 C2 C3 168.3(5) . . . . ?
O1 C1 C2 C3 -12.1(4) . . . . ?
C1 C2 C3 C5 152.7(3) . . . . ?
C1 C2 C3 C4 24.3(4) . . . . ?
C5 C3 C4 O1 -156.7(3) . . . . ?
C2 C3 C4 O1 -28.4(4) . . . . ?
C5 C3 C4 C7 -34.7(5) . . . . ?
C2 C3 C4 C7 93.7(4) . . . . ?
C2 C3 C5 C6 67.5(5) . . . . ?
C4 C3 C5 C6 -172.0(4) . . . . ?
O1 C4 C7 O3 67.2(3) . . . . ?
C3 C4 C7 O3 -52.8(4) . . . . ?
O1 C4 C7 C8 -52.5(4) . . . . ?
C3 C4 C7 C8 -172.5(4) . . . . ?
O3 C7 C8 C9 -179.9(3) . . . . ?
C4 C7 C8 C9 -61.4(5) . . . . ?
O4 C10 C11 C12 173.7(5) . . . . ?
O3 C10 C11 C12 -6.7(6) . . . . ?
O4 C10 C11 C16 -6.8(7) . . . . ?
O3 C10 C11 C16 172.8(4) . . . . ?
C16 C11 C12 C13 -0.5(7) . . . . ?
C10 C11 C12 C13 179.0(4) . . . . ?
C11 C12 C13 C14 -0.1(7) . . . . ?
C12 C13 C14 C15 0.2(7) . . . . ?
C12 C13 C14 N1 179.7(4) . . . . ?
C13 C14 C15 C16 0.3(8) . . . . ?
N1 C14 C15 C16 -179.2(4) . . . . ?
C14 C15 C16 C11 -0.9(8) . . . . ?
C12 C11 C16 C15 0.9(7) . . . . ?
C10 C11 C16 C15 -178.6(5) . . . . ?
C13 C14 N1 O6 -179.5(5) . . . . ?
C15 C14 N1 O6 0.1(7) . . . . ?
C13 C14 N1 O5 2.9(8) . . . . ?
C15 C14 N1 O5 -177.6(6) . . . . ?
O2 C1 O1 C4 172.9(5) . . . . ?
C2 C1 O1 C4 -6.8(4) . . . . ?
C7 C4 O1 C1 -105.3(3) . . . . ?
C3 C4 O1 C1 22.7(3) . . . . ?
O4 C10 O3 C7 0.0(6) . . . . ?
C11 C10 O3 C7 -179.6(3) . . . . ?
C8 C7 O3 C10 -90.1(4) . . . . ?
C4 C7 O3 C10 146.5(3) . . . . ?
 
